# Supplementary material
Source: PubMed Central journal article supplement (PMC6980254)

Appendix Figure 1: Flow diagram for CARDIA

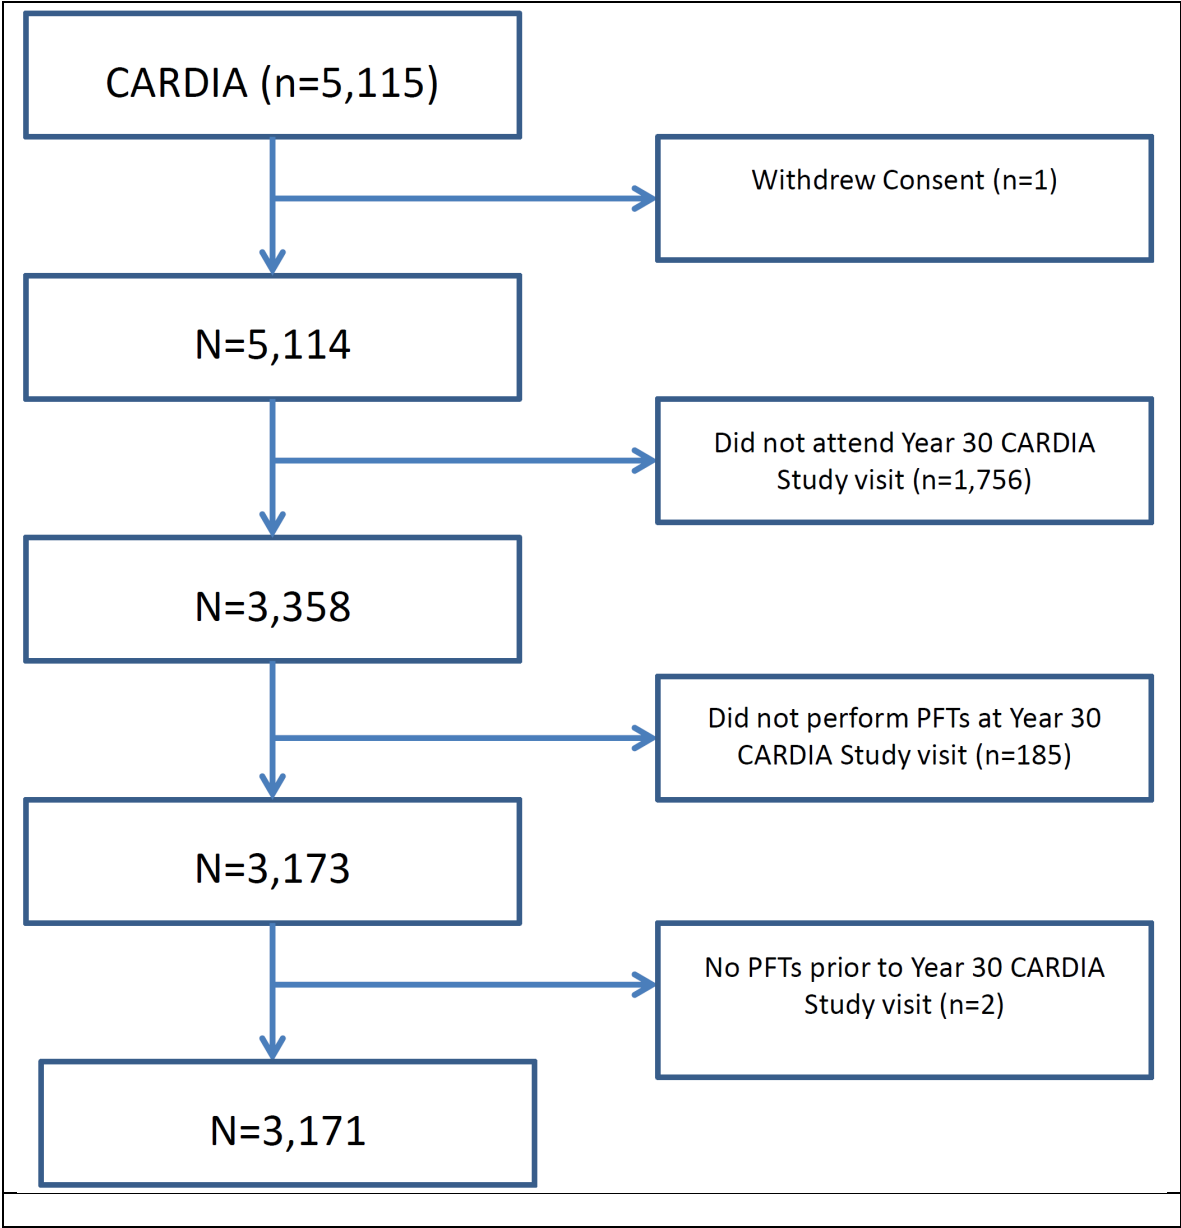

**Appendix Figure 2:** Graphical depiction of the 8 initial spirometric trajectories in CARDIA defined by serial measures of the FEV<sub>1</sub> expressed as a percent of predicted.

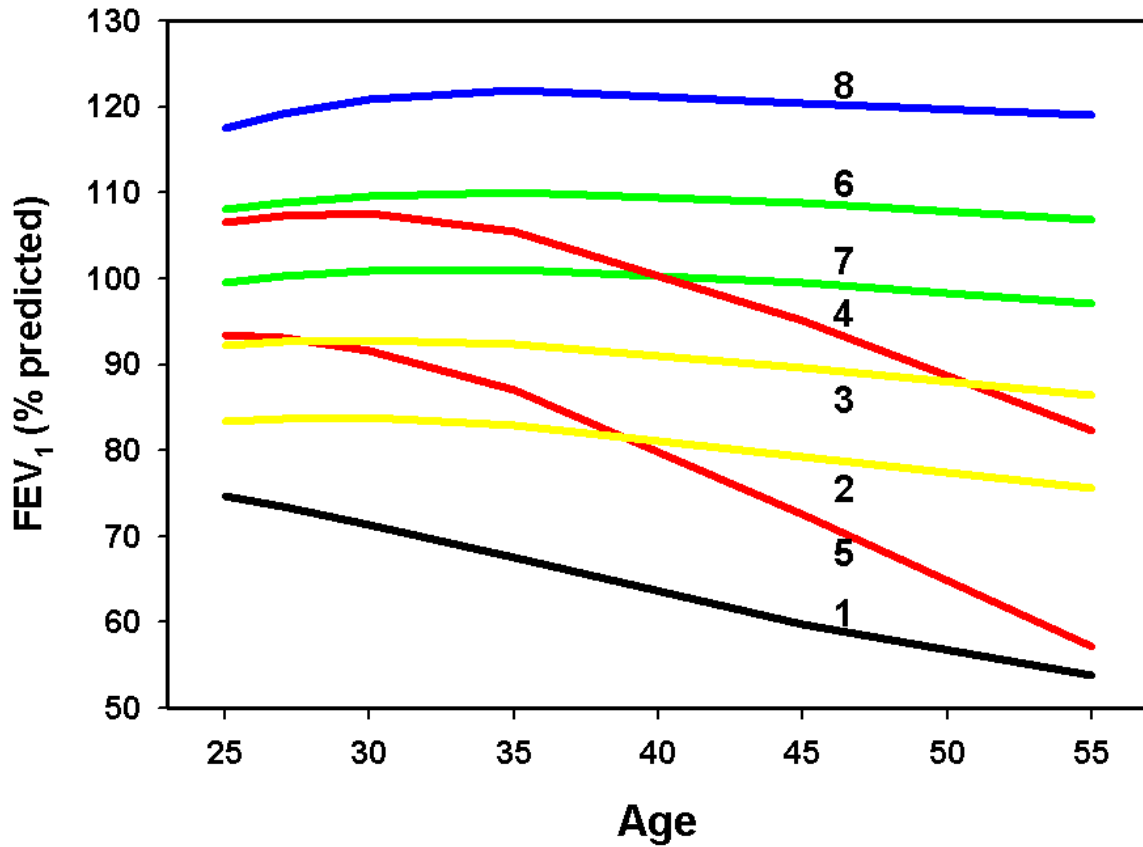

- Preserved Ideal Lung Health
- Preserved Good Lung Health
- Preserved Good Lung Health
- Worsening Lung Health
- Worsening Lung Health
- Preserved Impaired Lung Health
- Preserved Impaired Lung Health
- Persistently Poor Lung Health

Appendix Figure 2 depicts the 8 initial trajectories of the FEV1% in the CARDIA cohort. Clinical, epidemiologic and spirometric characteristics of these trajectories are provided in Appendix Table 1. Visual inspection of both Appendix Figure 1 and the data presented in Appendix Table 1 led us to aggregate trajectories 2 and 3 into one group called Preserved Impaired Lung Health, trajectories 6 and 7 into Preserved Good Lung Health and trajectories 4 and 5 into Worsening Lung Health. Appendix Figures 2A-H on the following pages provides illustrations of the Spaghetti Plots for each of the subgroups. Appendix Figures 3A-C provides schematics for the combination of Spaghetti plots to form the Preserved Impaired Lung Health, Preserved Good Lung Health and Worsening Lung Health trajectories.

**Appendix Table 1:**

|                                         | Trajectories of FEV1% (n=3,171) |                       |             |                           |            |                  |             |                          |
|-----------------------------------------|---------------------------------|-----------------------|-------------|---------------------------|------------|------------------|-------------|--------------------------|
|                                         | <b>PRESERVED IDEAL</b>          | <b>PRESERVED GOOD</b> |             | <b>PRESERVED IMPAIRED</b> |            | <b>WORSENING</b> |             | <b>PERSISTENTLY POOR</b> |
| <b>Baseline</b>                         | <b>8</b>                        | <b>6</b>              | <b>7</b>    | <b>2</b>                  | <b>3</b>   | <b>4</b>         | <b>5</b>    | <b>1</b>                 |
| N (year 30 lung function available)     | 187                             | 577                   | 901         | 358                       | 906        | 117              | 63          | 62                       |
| Sex – Female, N (%)                     | 121 (64.7)                      | 347 (60.1)            | 533 (59.2)  | 183 (51.1)                | 486 (53.6) | 79 (67.5)        | 36 (57.1)   | 33 (53.2)                |
| Race- Black, N (%)                      | 108 (57.8)                      | 269 (46.6)            | 385 (42.7)  | 197 (55.0)                | 395 (43.6) | 71 (60.7)        | 48 (76.2)   | 37 (59.7)                |
| Age – years (SD) (Y0)                   | 25.0 (3.7)                      | 25.2 (3.4)            | 25.2 (3.6)  | 24.9 (3.6)                | 25.1 (3.5) | 24.4 (3.8)       | 24.0 (4.1)  | 24.2 (3.9)               |
| <i>Smoking (Y0)</i>                     |                                 |                       |             |                           |            |                  |             |                          |
| Never, N (%)                            | 121 (64.7)                      | 345 (60.2)            | 571 (63.8)  | 210 (58.8)                | 548 (60.8) | 63 (54.3)        | 26 (41.3)   | 34 (55.7)                |
| Former, N (%)                           | 29 (15.5)                       | 105 (18.3)            | 134 (15.0)  | 31 (8.7)                  | 104 (11.5) | 19 (16.4)        | 6 (9.5)     | 6 (9.8)                  |
| Current, N (%)                          | 37 (19.8)                       | 123 (21.5)            | 190 (21.2)  | 116 (32.5)                | 249 (27.6) | 34 (29.3)        | 31 (49.2)   | 21 (34.4)                |
| <i>Smoking (Y30)</i>                    |                                 |                       |             |                           |            |                  |             |                          |
| Never, N (%)                            | 125 (67.9)                      | 361 (63.4)            | 598 (66.8)  | 219 (61.9)                | 573 (63.8) | 58 (50.9)        | 20 (32.3)   | 32 (53.3)                |
| Former, N (%)                           | 39 (21.2)                       | 139 (24.4)            | 201 (22.5)  | 83 (23.4)                 | 209 (23.3) | 22 (19.3)        | 15 (24.2)   | 14 (23.3)                |
| Current, N (%)                          | 20 (10.9)                       | 69 (12.1)             | 96 (10.7)   | 52 (14.7)                 | 116 (12.9) | 34 (29.8)        | 27 (43.6)   | 14 (23.3)                |
| BMI - kg/m <sup>2</sup> (Y0)            | 24.4 (4.3)                      | 24.2 (4.6)            | 23.9 (4.5)  | 25.1 (5.5)                | 24.2 (4.6) | 25.4 (4.9)       | 26.3 (5.7)  | 25.9 (6.8)               |
| BMI - kg/m <sup>2</sup> (Y30)           | 29.3 (6.1)                      | 29.5 (6.5)            | 29.5 (6.5)  | 32.2 (8.5)                | 30.6 (6.8) | 35.2 (8.3)       | 35.0 (10.9) | 32.1 (7.6)               |
| Asthma, N % (Y0)                        | 3 (1.6%)                        | 7 (1.2%)              | 18 (2.0%)   | 34 (9.5%)                 | 37 (4.1%)  | 1 (0.8%)         | 3 (4.8%)    | 13 (21.0%)               |
| Baseline FVC - % predicted              | 118.0 (8.4)                     | 109.4 (7.8)           | 101.7 (7.8) | 89.5 (8.6)                | 95.3 (8.2) | 108.9 (8.8)      | 99.1 (10.1) | 84.5 (10.9)              |
| Baseline FEV <sub>1</sub> - % predicted | 118.8 (7.1)                     | 108.9 (6.0)           | 100.1 (5.3) | 83.0 (6.2)                | 92.3 (5.5) | 106.8 (6.9)      | 91.0 (7.9)  | 73.4 (8.8)               |

|                                                       |              |             |            |            |            |             |             |             |
|-------------------------------------------------------|--------------|-------------|------------|------------|------------|-------------|-------------|-------------|
| Baseline FEV <sub>1</sub> /FVC %                      | 86.1 (4.4)   | 84.9 (5.1)  | 83.9 (5.6) | 79.3 (7.6) | 82.5 (6.2) | 84.3 (5.5)  | 79.0 (6.2)  | 75.2 (10.4) |
| Year 30 FVC - % predicted                             | 118.7 (10.5) | 106.7 (8.6) | 97.4 (8.2) | 79.6 (9.7) | 87.7 (9.1) | 83.7 (11.4) | 68.1 (13.5) | 65.8 (12.1) |
| Year 30 FEV <sub>1</sub> - % predicted                | 120.4 (9.3)  | 107.2 (7.4) | 96.9 (6.9) | 75.3 (7.6) | 85.5 (7.3) | 77.7 (9.5)  | 53.7 (10.8) | 52.1 (12.0) |
| Year 30 FEV <sub>1</sub> /FVC                         | 79.8 (4.4)   | 78.8 (5.3)  | 78.1 (5.4) | 74.7 (7.5) | 76.5 (6.1) | 73.8 (8.7)  | 63.6 (13.1) | 64.5 (14.7) |
| Decline FVC (baseline to year 30) – mL/y              | -19 (15)     | -21 (13)    | -22 (13)   | -27 (14)   | -25 (14)   | -46 (17)    | -50 (16)    | -36 (21)    |
| Decline FEV <sub>1</sub> (baseline to year 30) – mL/y | -25 (11)     | -26 (12)    | -26 (11)   | -26 (11)   | -28 (11)   | -50 (13)    | -53 (13)    | -36 (16)    |
|                                                       |              |             |            |            |            |             |             |             |
| <i>Emphysema (N year 25 CT scan available)</i>        | 160          | 476         | 738        | 298        | 786        | 98          | 55          | 49          |
| Centrilobular N (%)                                   | 4 (2.5%)     | 16 (3.4%)   | 27 (3.7%)  | 18 (6.0%)  | 27 (3.4%)  | 7 (7.1%)    | 10 (18.2%)  | 7 (14.3%)   |
| Paraseptal                                            | 4 (2.5%)     | 22 (4.6%)   | 29 (3.9%)  | 22 (7.4%)  | 36 (4.6%)  | 11 (11.2%)  | 14 (25.4%)  | 7 (14.3%)   |
| Centrilobular or paraseptal                           | 6 (3.8%)     | 26 (5.5%)   | 42 (5.7%)  | 31 (10.4%) | 44 (5.6%)  | 13 (13.3%)  | 17 (30.9%)  | 10 (20.4%)  |

**Appendix Figure 2A)** Spaghetti plot for Trajectory 1 which is labeled as the “Persistently Poor Lung Health” trajectory in the 5-trajectory model.

### Trajectory 1

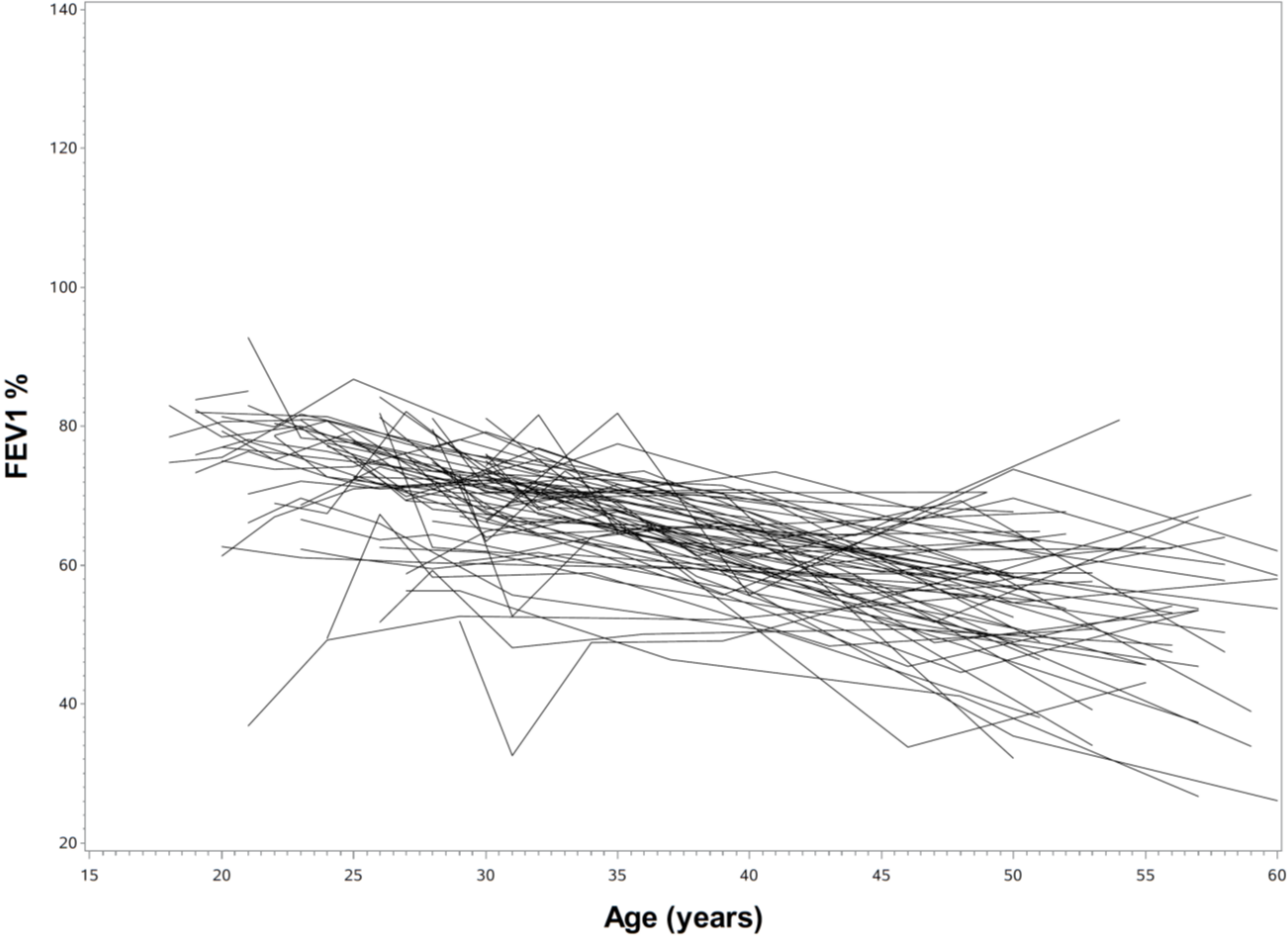

**Appendix Figure 2B)** Spaghetti plot for Trajectory 2 which is combined with Trajectory 3 on the following page to become the “Preserved Impaired Lung Health” trajectory in the 5-trajectory model.

## Trajectory 2

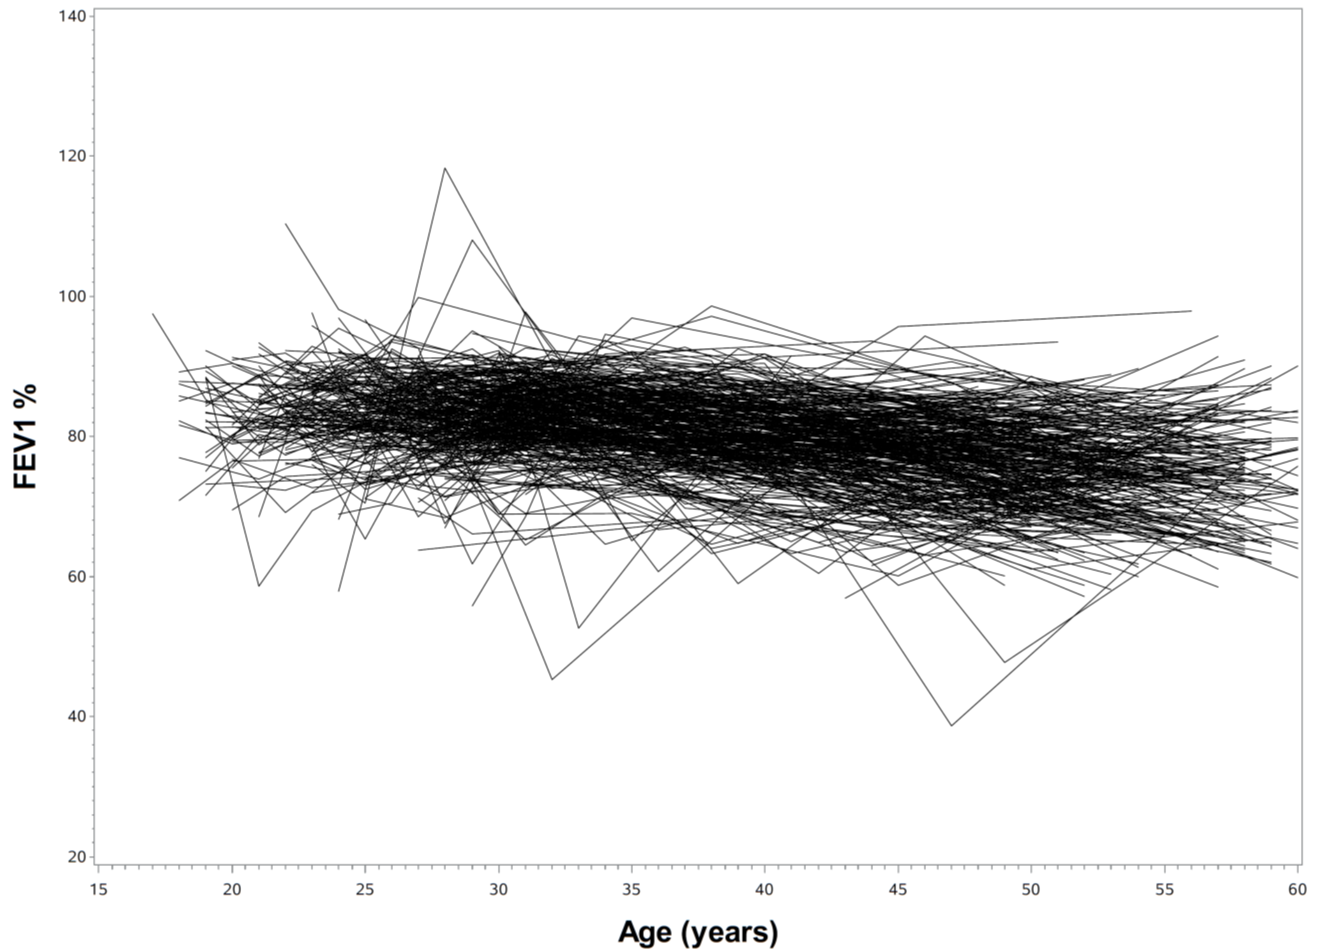

**Appendix Figure 2C)** Spaghetti plot for Trajectory 3 which is combined with Trajectory 2 on the previous page to become the “Preserved Impaired Lung Health” trajectory in the 5-trajectory model.

### Trajectory 3

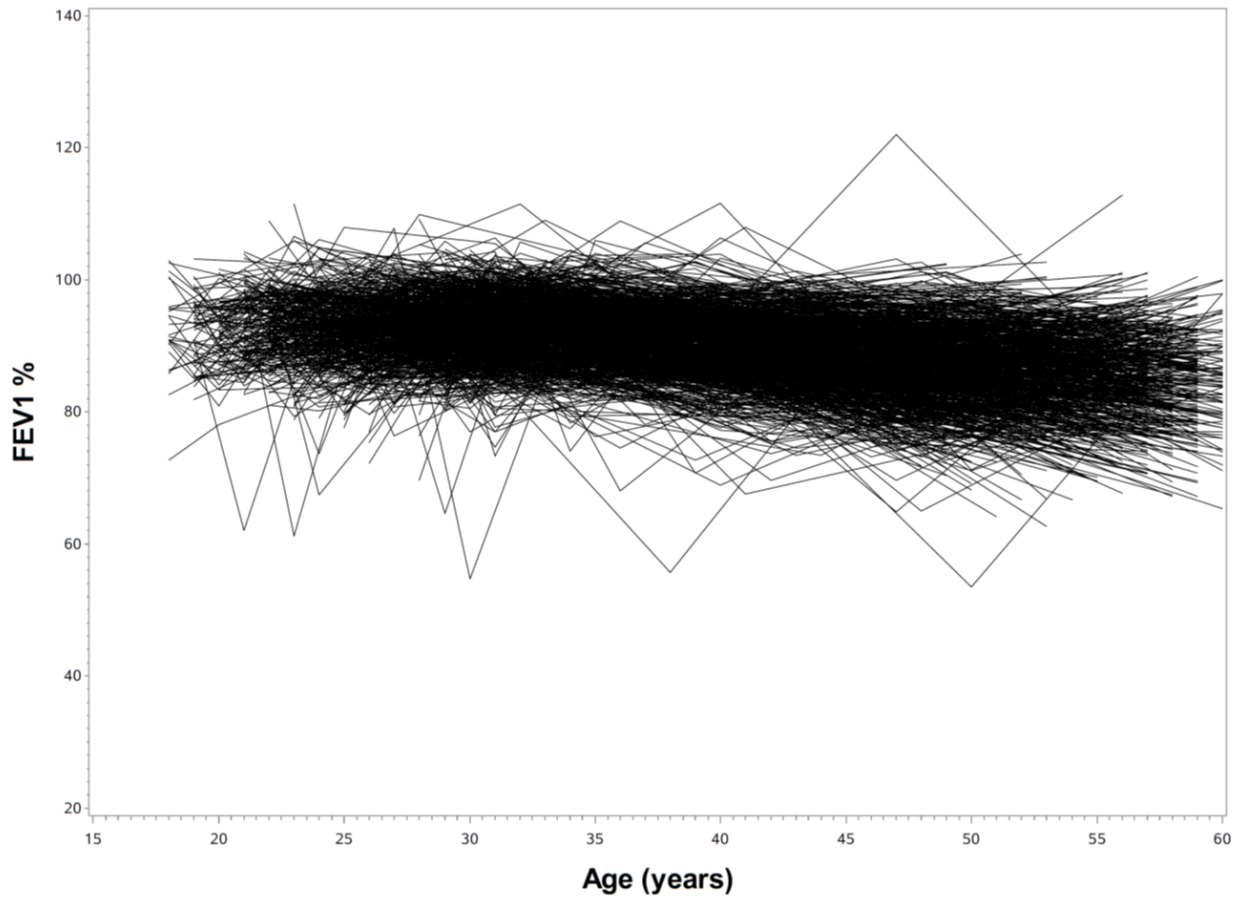



**Appendix Figure 2D)** Spaghetti plot for Trajectory 4 which is combined with Trajectory 5 on the next page to become the “Worsening Lung Health” trajectory in the 5-trajectory model.

### Trajectory 4

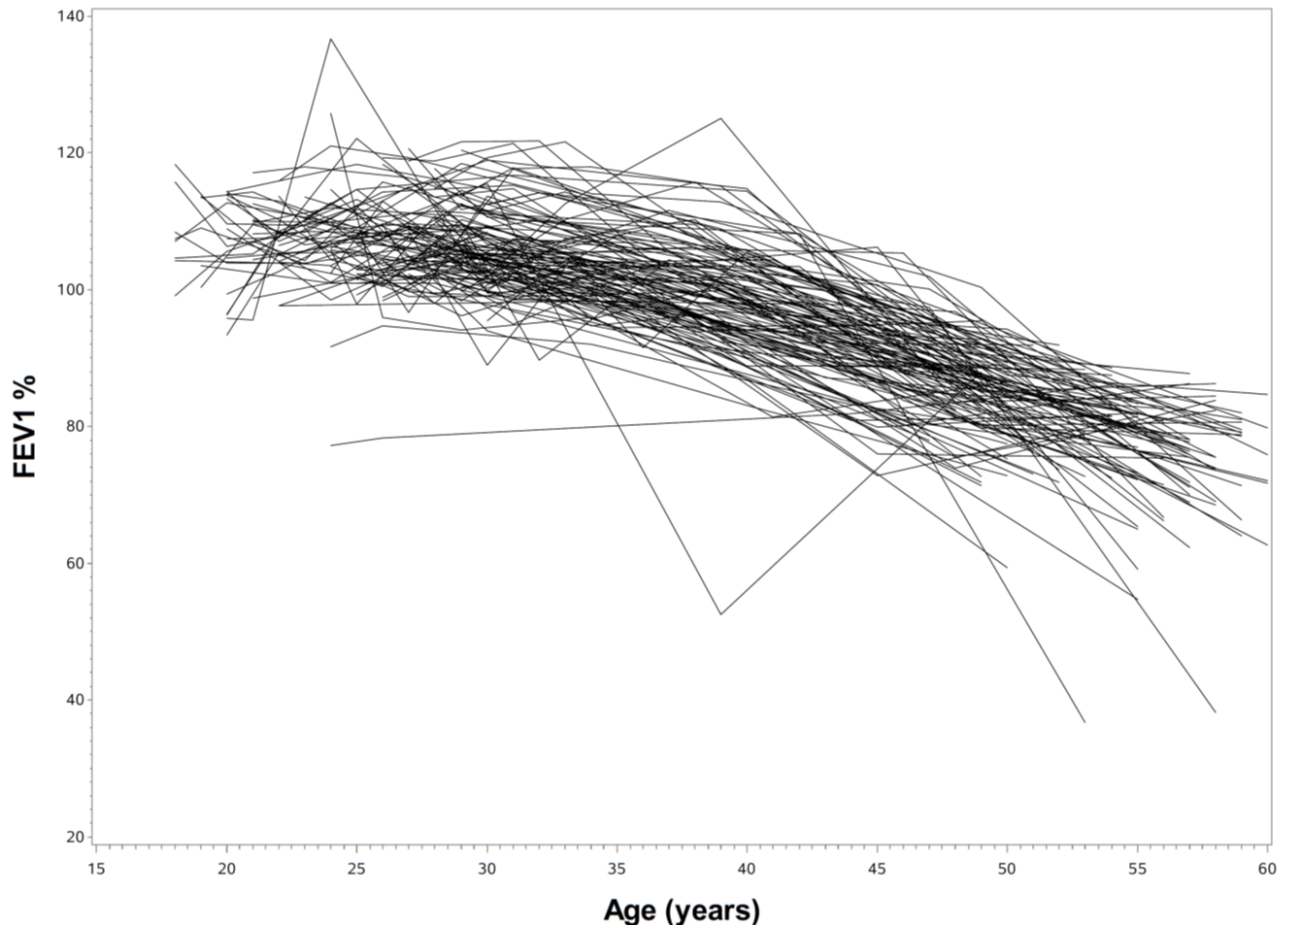

**Appendix Figure 2E)** Spaghetti plot for Trajectory 5 which is combined with Trajectory 4 on the previous page to become the “Worsening Lung Health” trajectory in the 5-trajectory model.

### Trajectory 5

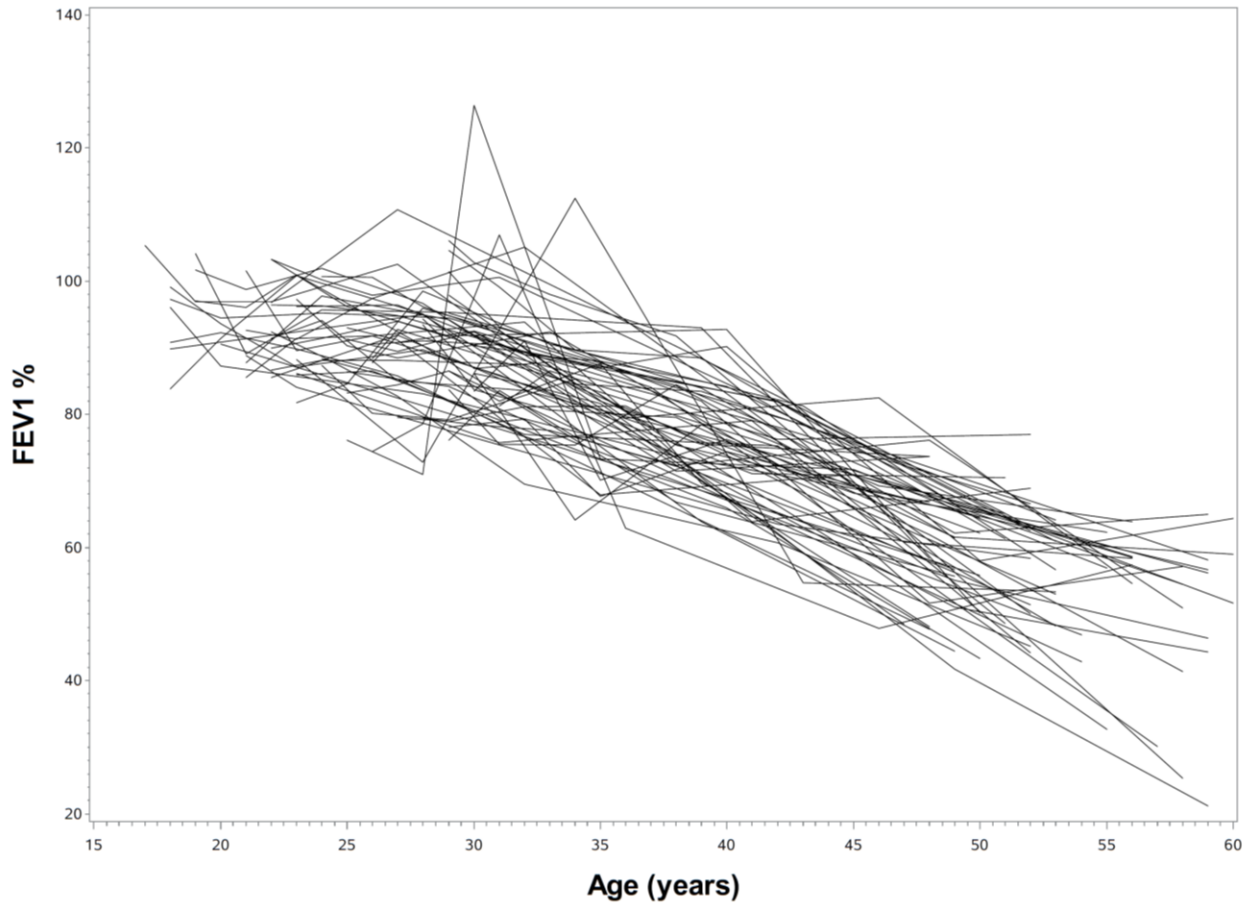

**Appendix Figure 2F)** Spaghetti plot for Trajectory 6 which is combined with Trajectory 7 on the following page to become the “Preserved Good Lung Health” trajectory in the 5-trajectory model.

### Trajectory 6

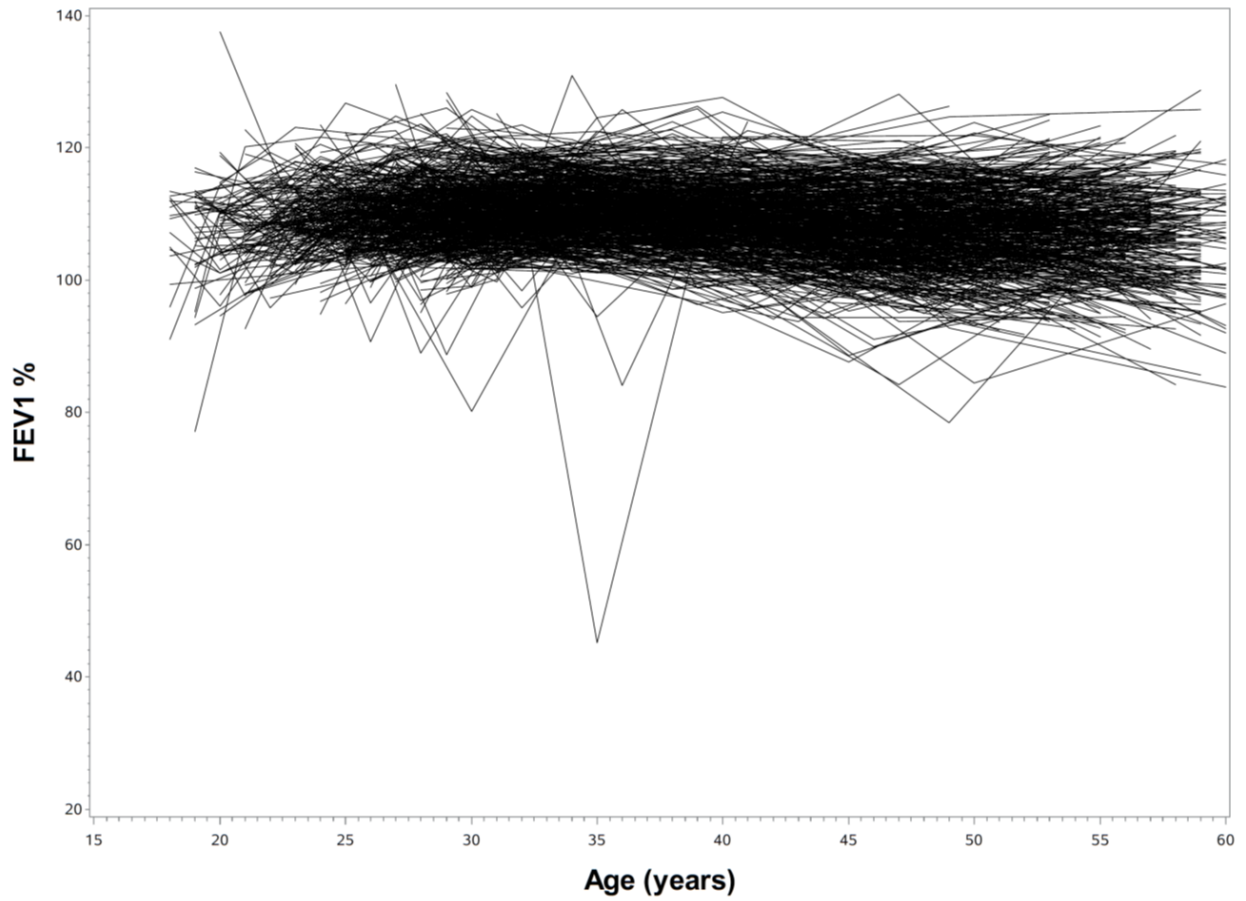

**Appendix Figure 2G)** Spaghetti plot for Trajectory 7 which is combined with Trajectory 6 on the previous page to become the “Preserved Good Lung Health” trajectory in the 5-trajectory model.

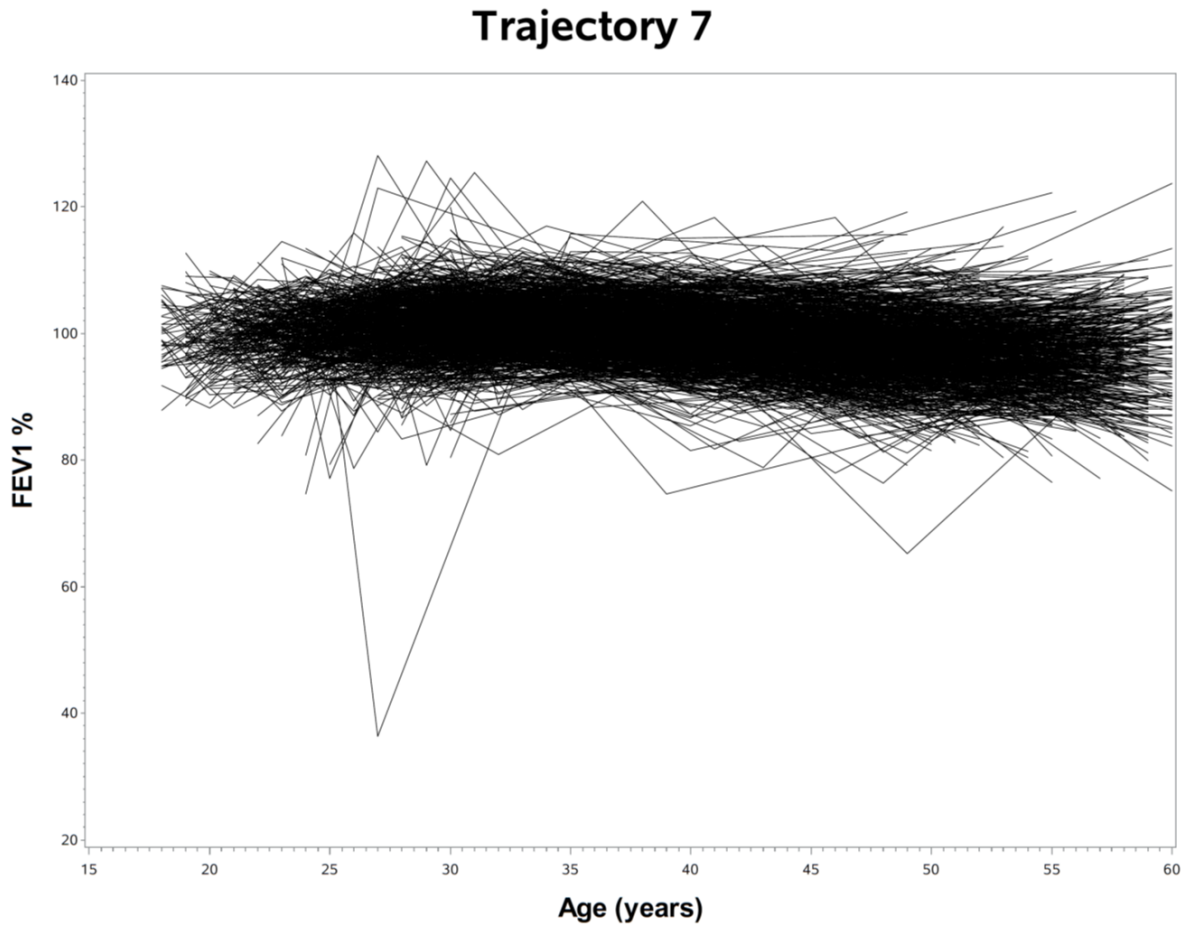

**Appendix Figure 2H)** Spaghetti plot for Trajectory 8 which is the “Preserved Ideal Lung Health” trajectory in the 5-trajectory model.

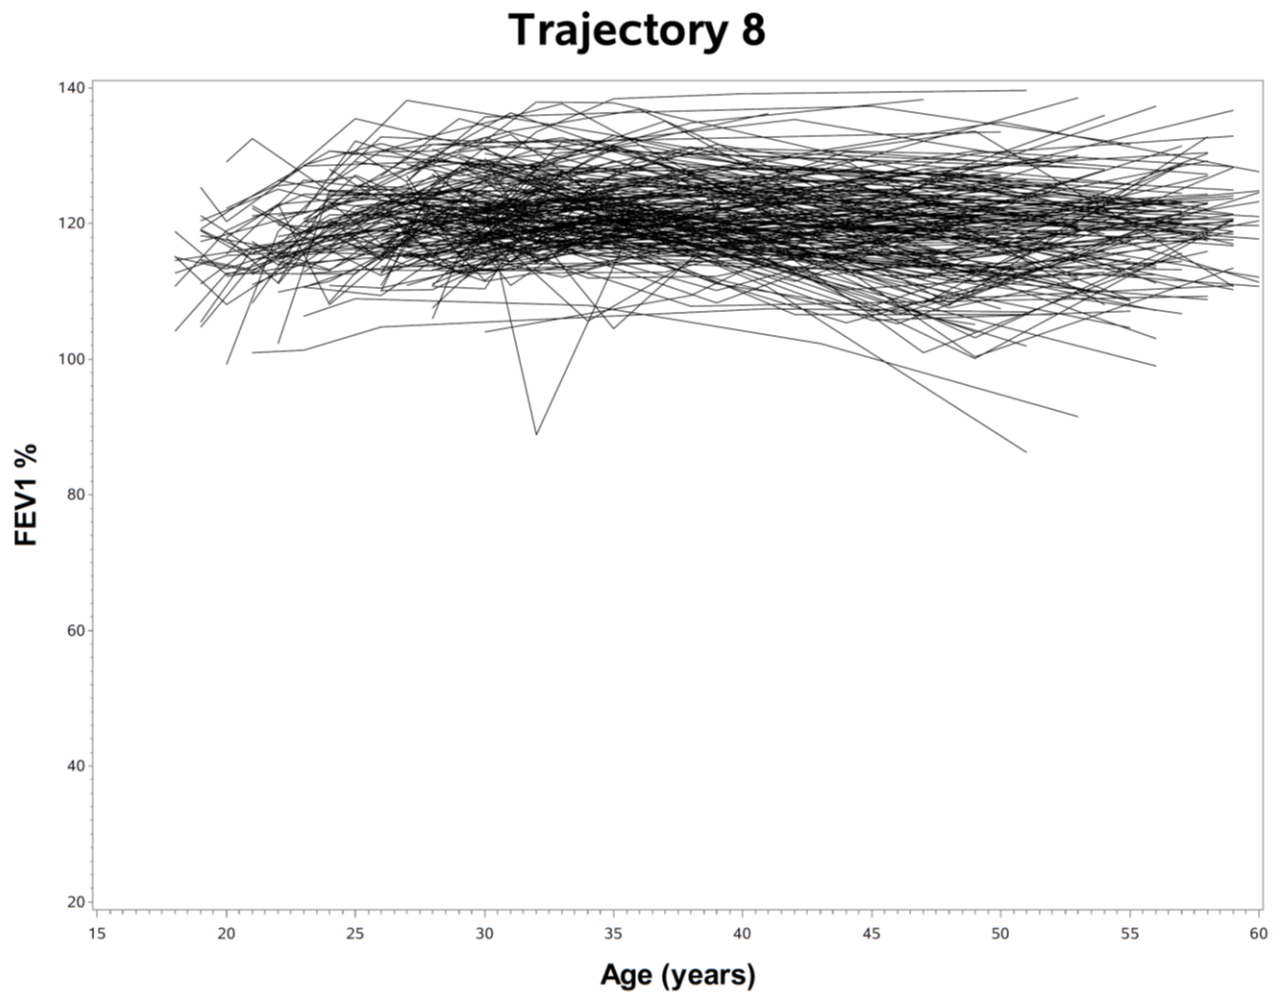

**Appendix Figure 3A)** Schematic for the combination of trajectories 2 and 3 to become “Preserved Impaired Lung Health”.

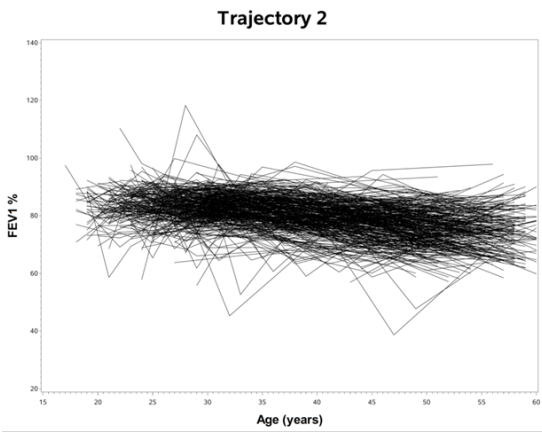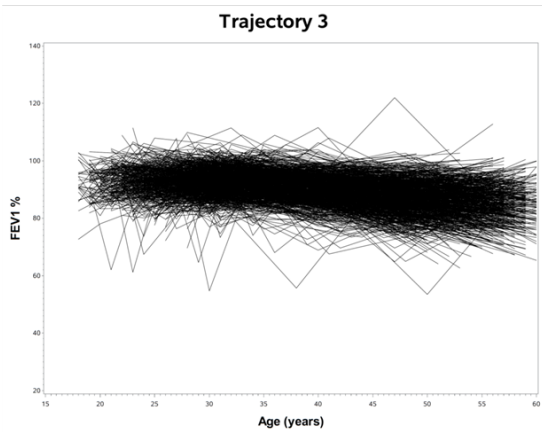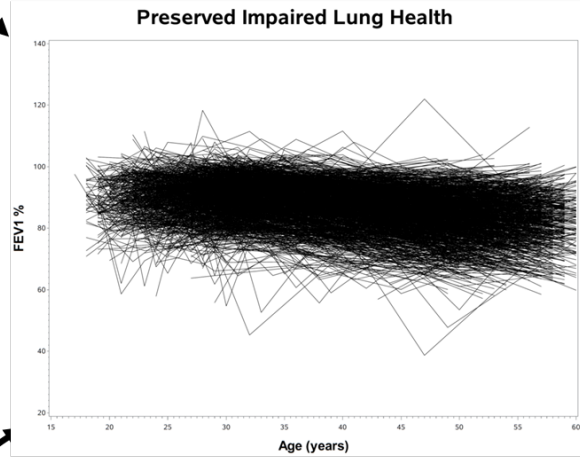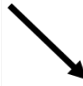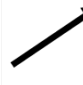

**Appendix Figure 3B)** Schematic for the combination of trajectories 4 and 5 to become “Worsening Lung Health”.

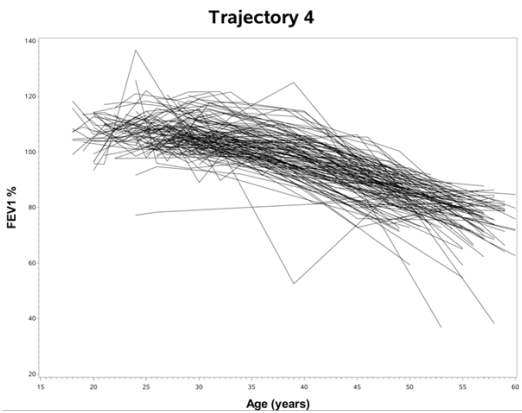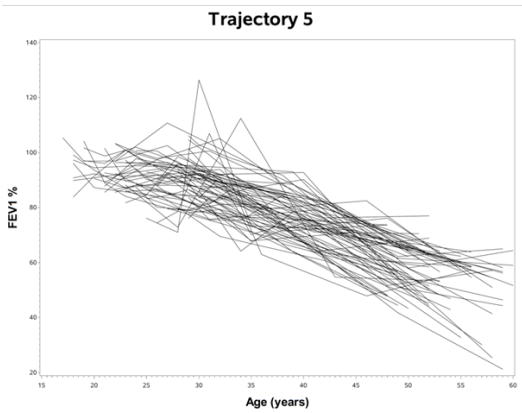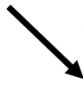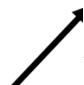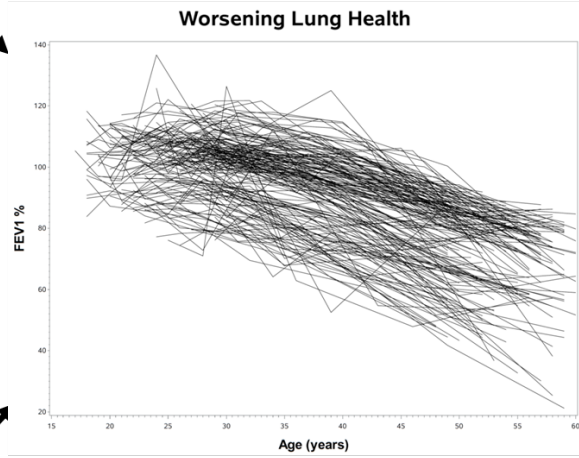

**Appendix Figure 3C)** Schematic for the combination of trajectories 6 and 7 to become “Preserved Good Lung Health”.

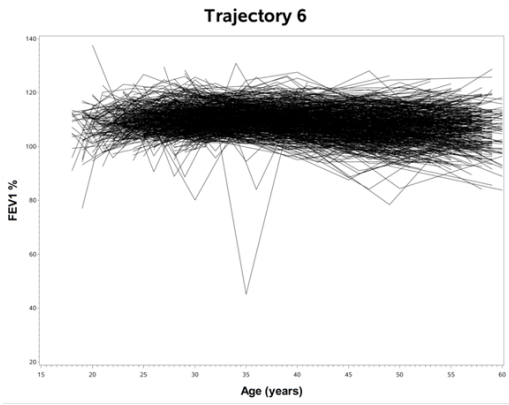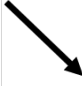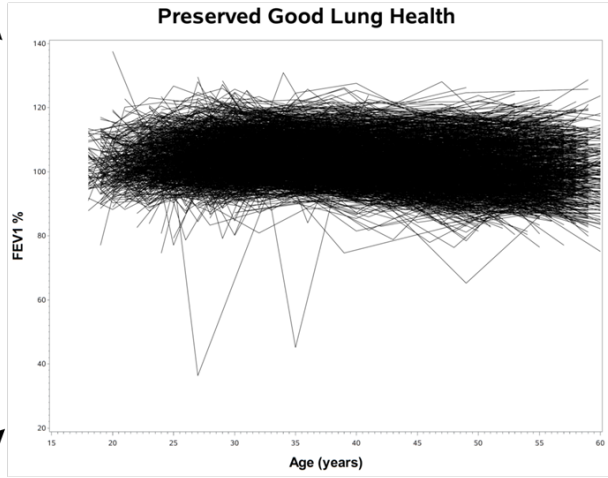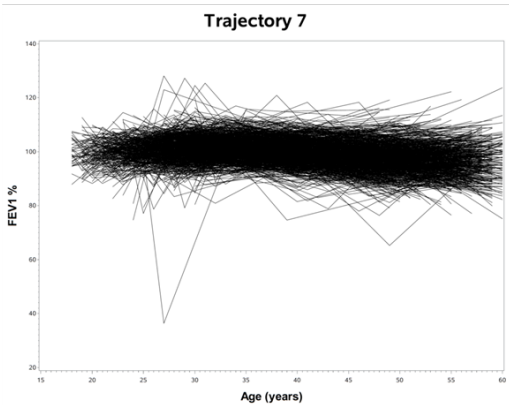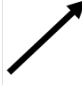



**Appendix Table 2:** Results of multi-variable logistic regression modeling to predict emphysema (CLE or PSE) on Year 25 CT scan. Note that the Preserved Ideal Lung Health trajectory is referent for these analyses.

|                    | Estimate            | OR    | CI         | P Value |
|--------------------|---------------------|-------|------------|---------|
| Age (Y0)           | -0.005              | 0.995 | 0.95-1.05  | 0.52    |
| Race (Black=1)     | 1.57                | 4.78  | 3.23-7.10  | <0.0001 |
| Sex (male =1)      | 0.42                | 1.53  | 1.07-2.19  | 0.02    |
| Pack Years (Y25)   | 0.1                 | 1.11  | 1.09-1.12  | <0.0001 |
| BMI (Y0)           | -0.17               | 0.85  | 0.80-0.89  | <0.0001 |
| Preserved Ideal    | Referent Trajectory |       |            |         |
| Preserved Good     | 0.34                | 1.40  | 0.57-3.45  | 0.47    |
| Preserved Impaired | 0.33                | 1.39  | 0.56-3.45  | 0.48    |
| Worsening          | 1.62                | 5.06  | 1.84-13.96 | 0.002   |
| Persistently Poor  | 1.58                | 4.85  | 1.43-16.44 | 0.01    |

Note that the model was also adjusted for CARDIA center and change in BMI from Y0 to Y25.

**Appendix Figure 4)** Prevalence of emphysema by subtype on the Year 15, Year 20 and Y25 CT scans. CLE: Centrilobular Emphysema; PSE: Paraseptal Emphysema.

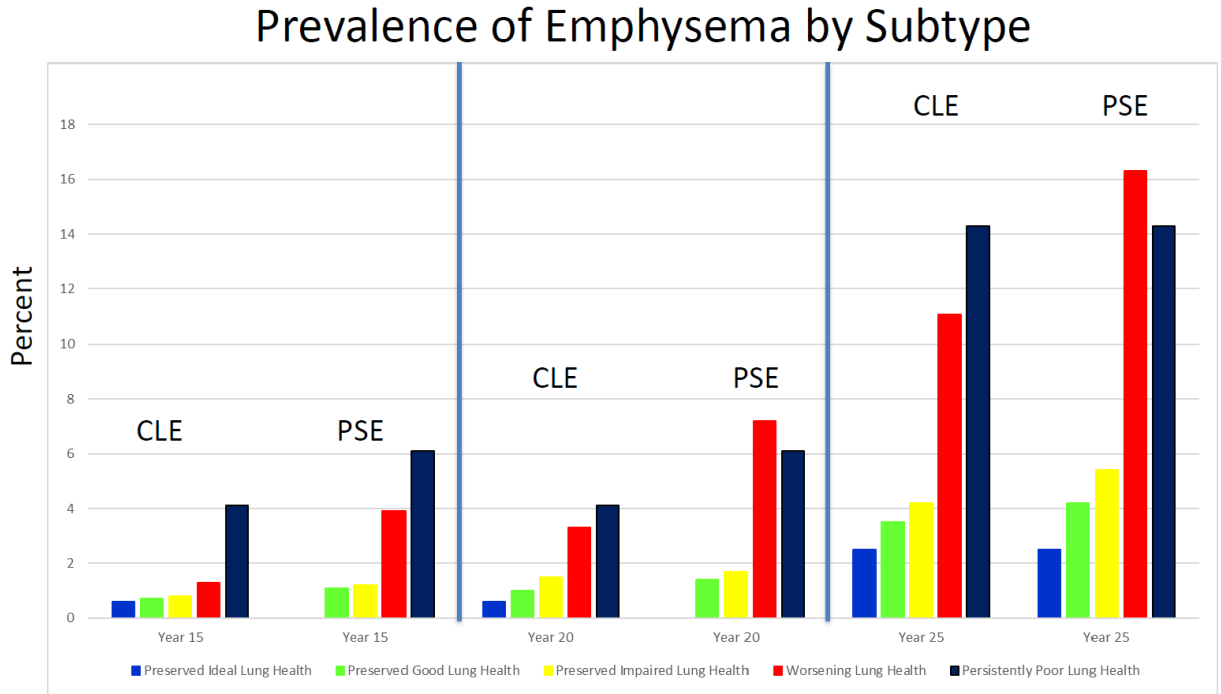

**Appendix Figure 5) Prevalence of emphysema (centrilobular and/or paraseptal) by smoking status on the Year 15, Year 20 and Year 25 CT scans.**

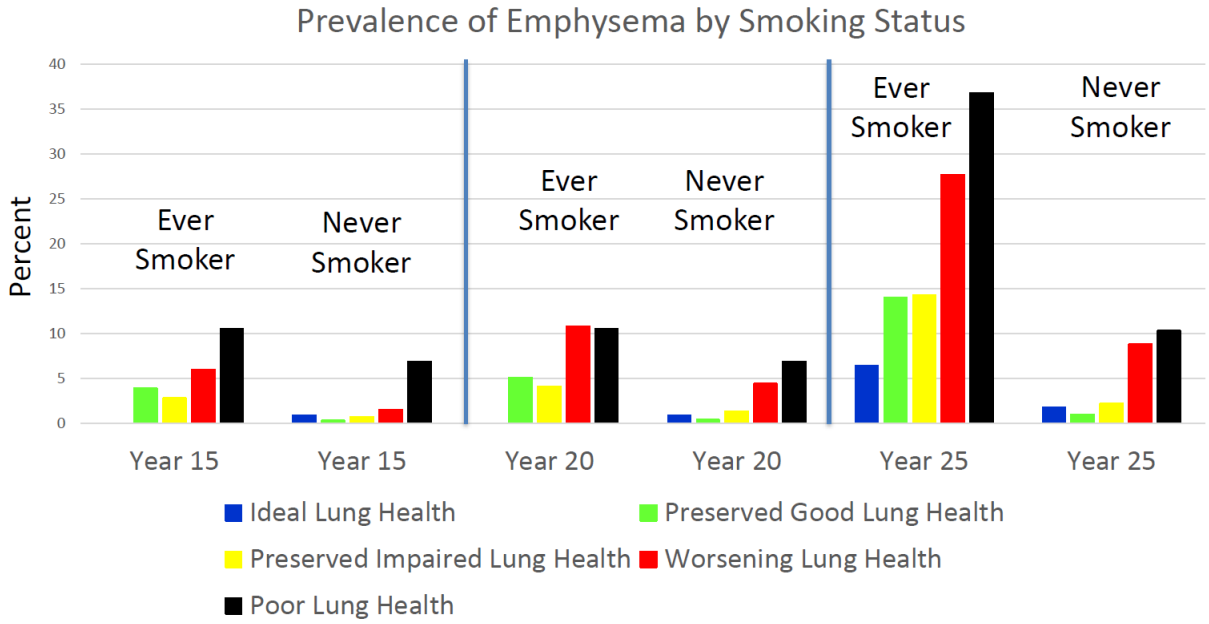

Supplement: NIHMS1059289-supplement-supplement.pdf [file NIHMS1059289-supplement-supplement.pdf]
